# Supplementary material for: Interplay of Ionic Species in Salts of Homoleptic Quaternary Phosphonium Cations Bearing Linear Biphenyl Moieties
Source: MDPI journal article supplement (doi:10.3390/cryst13010059), 2022-12-29
Supplement: s1 [file s1]

## Supplementary Information

**Table S1:** Crystallographic data and refinement parameters

| <i>Compound</i>                                       | <b>1</b>                                                                         | <b>2</b>                                                                                                        |
|-------------------------------------------------------|----------------------------------------------------------------------------------|-----------------------------------------------------------------------------------------------------------------|
| <i>Formula</i>                                        | C <sub>48</sub> H <sub>36</sub> P <sup>+</sup> , N(CN) <sub>2</sub> <sup>-</sup> | 2(C <sub>48</sub> H <sub>36</sub> P <sup>+</sup> ) 2(Br <sup>-</sup> ), 2(CH <sub>3</sub> CN), H <sub>2</sub> O |
| <i>Empirical formula</i>                              | C <sub>50</sub> H <sub>36</sub> N <sub>3</sub> P                                 | C <sub>100</sub> H <sub>80</sub> Br <sub>2</sub> N <sub>2</sub> OP <sub>2</sub>                                 |
| <i>Formula weight /g mol<sup>-1</sup></i>             | 709.79                                                                           | 1547.42                                                                                                         |
| <i>Crystal system</i>                                 | Triclinic                                                                        | Triclinic                                                                                                       |
| <i>Space group</i>                                    | <i>P</i> $\bar{1}$ (No. 2)                                                       | <i>P</i> $\bar{1}$ (No. 2)                                                                                      |
| <i>a /Å</i>                                           | 11.9466(7)                                                                       | 12.6244(5)                                                                                                      |
| <i>b /Å</i>                                           | 12.1287(7)                                                                       | 12.7476(5)                                                                                                      |
| <i>c /Å</i>                                           | 14.3527(9)                                                                       | 13.8190(5)                                                                                                      |
| <i>α /°</i>                                           | 79.239(5)                                                                        | 78.115(3)                                                                                                       |
| <i>β /°</i>                                           | 66.796(6)                                                                        | 65.545(4)                                                                                                       |
| <i>γ /°</i>                                           | 89.851(5)                                                                        | 87.063(3)                                                                                                       |
| <i>V /Å<sup>3</sup></i>                               | 1872.01(2)                                                                       | 1979.55(15)                                                                                                     |
| <i>Z</i>                                              | 2                                                                                | 1                                                                                                               |
| <i>D<sub>c</sub> /g cm<sup>-3</sup></i>               | 1.259                                                                            | 1.298                                                                                                           |
| <i>μ /mm<sup>-1</sup></i>                             | 0.114                                                                            | 2.074                                                                                                           |
| <i>F<sub>000</sub></i>                                | 744                                                                              | 802                                                                                                             |
| <i>Crystal size (mm<sup>3</sup>)</i>                  | 0.27x0.18x0.08                                                                   | 0.14x0.13x0.13                                                                                                  |
| <i>θ range for data collection (°)</i>                | 2.081 to 26.730                                                                  | 3.546 to 64.996                                                                                                 |
| <i>Miller index ranges</i>                            | -15 ≤ h ≤ 15                                                                     | -14 ≤ h ≤ 14                                                                                                    |
|                                                       | -15 ≤ k ≤ 15                                                                     | -14 ≤ k ≤ 14                                                                                                    |
|                                                       | -18 ≤ l ≤ 18                                                                     | -16 ≤ l ≤ 16                                                                                                    |
| <i>Completeness to θ<sub>max</sub> (%)</i>            | 99.9                                                                             | 99.3                                                                                                            |
| <i>Reflections (collected)</i>                        | 32127                                                                            | 21674                                                                                                           |
| <i>Min. and max. transmission</i>                     | 0.88707 and 1.0                                                                  | 0.96273 and 1.0                                                                                                 |
| <i>2θ<sub>max</sub> /°</i>                            | 53.46                                                                            | 130.0                                                                                                           |
| <i>Reflections (collected)</i>                        | 27557                                                                            | 21699                                                                                                           |
| <i>R<sub>int</sub></i>                                | 0.0506                                                                           | 0.0396                                                                                                          |
| <i>Data / restraints / parameters</i>                 | 7953 / 0 / 497                                                                   | 6689 / 41 / 510                                                                                                 |
| <i>Reflections (I &gt; 2σ(I))</i>                     | 5672                                                                             | 4357                                                                                                            |
| <i>Final GooF</i>                                     | 1.000                                                                            | 1.000                                                                                                           |
| <i>Final R indices [I &gt; 2σ(I)]</i>                 | R1 = 0.0490, wR2 = 0.1003                                                        | R1 = 0.0364, wR2 = 0.0777                                                                                       |
| <i>R indices (all data)</i>                           | R1 = 0.0773, wR2 = 0.1159                                                        | R1 = 0.0598, wR2 = 0.0812                                                                                       |
| <i>Largest diff. peak and hole (e Å<sup>-3</sup>)</i> | 0.337 and -0.333                                                                 | 0.379 and -0.521                                                                                                |
| <i>CCDC number</i>                                    | 2211649                                                                          | 2211650                                                                                                         |

**Table S2:** Relevant geometrical parameters.

|                              | Compound 1 | Compound 2 |
|------------------------------|------------|------------|
| <b>C-P-C bond angles /°</b>  |            |            |
| C(101)–P–C(201)              | 109.10(9)  | 108.40(11) |
| C(101)–P–C(301)              | 108.33(9)  | 108.59(12) |
| C(101)–P–C(401)              | 110.71(9)  | 111.69(12) |
| C(201)–P–C(301)              | 110.07(9)  | 109.07(11) |
| C(201)–P–C(401)              | 108.47(8)  | 109.65(12) |
| C(301)–P–C(401)              | 110.15(9)  | 109.39(12) |
| <b>Interplanar angles /°</b> |            |            |
| ring 1a/ring 1b              | 36.83(9)   | 37.62(11)  |
| ring 2a/ring 2b              | 27.36(10)  | 35.18(12)  |
| ring 3a/ring 3b              | 27.48(7)   | 30.47(10)  |
| ring 4a/ring 4b              | 34.32(8)   | 34.43(10)  |

**Table S3:** Selected hydrogen-bond geometry (Å, °) for Compound 2.

| <i>D</i> –H... <i>A</i>       | <i>D</i> –H | H... <i>A</i> | <i>D</i> ... <i>A</i> | <i>D</i> –H... <i>A</i> |
|-------------------------------|-------------|---------------|-----------------------|-------------------------|
| O1W-H1W <i>A</i> ...Br1       | 0.84        | 2.51          | 3.349(3)              | 177                     |
| O1W-H1W <i>A</i> ...Br2       | 0.84        | 2.27          | 3.067(6)              | 159                     |
| O1W-H1W <i>B</i> ...N1        | 0.84        | 2.35          | 3.18(2)               | 174                     |
| C102-H102...O1W <sup>i</sup>  | 0.95        | 2.63          | 3.440(4)              | 143                     |
| C402-H402...O1W <sup>ii</sup> | 0.95        | 2.58          | 3.270(4)              | 129                     |
| C02-H02 <i>C</i> ...Br1       | 0.98        | 2.66          | 3.539(15)             | 159                     |
| C02-H02 <i>E</i> ...Br2       | 0.98        | 2.38          | 2.957(17)             | 112                     |

Symmetry codes: (i)  $-x+1, -y+1, -z+1$ ; (ii)  $x-1, y, z$ ; (iii)  $x+1, y, z$
